# Supplementary material
Source: publisher site journal article supplement (https://www.degruyterbrill.com/publication/journal_key/HTMP/downloadAsset/HTMP_CFP%20Polymer%20and%20Composite%20Materials%20and%20Graphene%20and%20Novel%20Nanomaterials%20222.pdf)
Supplement: Supplementary file 1 [file HTMP_CFP%20Polymer%20and%20Composite%20Materials%20and%20Graphene%20and%20Novel%20Nanomaterials%20222.pdf]

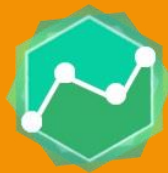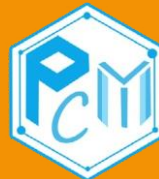

## SPECIAL ISSUES ON POLYMER AND COMPOSITE MATERIALS AND GRAPHENE AND NOVEL NANOMATERIALS

### GUEST EDITOR

---

Prof. Osman Adiguzel, Firat University, Elazig, Turkey

E-mail: [oadiguzel@firat.edu.tr](mailto:oadiguzel@firat.edu.tr)

### DESCRIPTION

---

We are thrilled to devote a new Special Issues on Polymer and Composite Materials and Graphene and Novel Nanomaterials. The participants of the 10th Global Conference on Polymer and Composite Materials (PCM 2023) and the 5th International Conference on Graphene and Novel Materials are encouraged to submit their unpublished manuscripts to these Special Issues.

This event has the objective of creating an international forum for academics, researchers, and scientists from worldwide to discuss worldwide results and proposals regarding the soundest issues related to Polymer, Composite Materials, Graphene and Novel Materials.

### HOW TO SUBMIT

---

We would like to highlight that all manuscripts will undergo the standard peer-review process (single-blind, with at least two independent reviewers). When entering your submission via the online submission system please choose "Special Issue: PMC". Submission of a manuscript implies that the work described has not been published before and is not under consideration for publication anywhere else.

Participants of The 12th on Polymer and Composite Materials can obtain a 50% discount on an APC fee.

The deadline for submissions is 31st of December 2025, but individual papers will be reviewed and published online on an ongoing basis.

What is in it for you?

Your benefits due to contribution to this Special Issue:

- ▶ indexation in Web of Science, SCOPUS, and many other services
- ▶ convenient, web-based paper submission and tracking system – Editorial Manager
- ▶ quick online publication upon completing the publishing process (continuous publication model)
- ▶ better visibility due to Open Access

- long-term preservation of the content (articles archived in Portico)
- extensive post-publication promotion for selected papers

In case of any further questions please contact the Managing Editor:

[joanna.kosinska@degruyter.com](mailto:joanna.kosinska@degruyter.com)

# PCM 2025

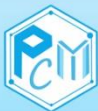

The 12th Global Conference on

## Polymer and Composite Materials

**November 4-7, 2025 Matsue, Japan**

[www.cpcmconf.org](http://www.cpcmconf.org)
